# Supplementary material
Source: publisher figshare collection journal article supplement (https://frontiersin.figshare.com/ndownloader/files/22542302)
Supplement: Supplementary file [file 22542302]

|             |                                                                                     |     |
|-------------|-------------------------------------------------------------------------------------|-----|
| CcdB_F      | MQFKVYTYK-RESRYRLFVDVQSDIIDTPGRRMVIPLASARLLSDKV-SRELYPVV-HIG                        | 57  |
| CcdB_pSLT   | MQFKVYTCK-RESRYRLFVDVQSDIIDTPGRRMAVPLVSARLLSEKV-PRDLYPVM-HIG                        | 57  |
| CcdB_CFT073 | MQFTVYRSRGRNAAFPFDVTSDIIGEINRRIVIPLTPIERFSRIRPPERLNPIILLVD                          | 60  |
| CcdB-1      | MQFTVYRSRGRNAAFPFDVTSDIIGEINRRIVIPLTPIERFSRIRPPERLNPIILLVD                          | 60  |
|             | ***.** : *:: : :.* ***. .**.:** . :* . * *:: :.                                     |     |
| CcdB_F      | DESWRMMTTQMVSVPVSVIGEEVADLSHRENDIKNAINLMF <sup>W</sup> GI                           | 101 |
| CcdB_pSLT   | DEPYRLLTTDMTSVPATVIGEEVADLSLRENDIKNAINLMF <sup>R</sup> GI                           | 101 |
| CcdB_CFT073 | GKEYVLMTHETATVPVNALGTKFCDA <sup>S</sup> AHRTLIK <sup>S</sup> ALDFML <sup>L</sup> GI | 104 |
| CcdB-1      | GKEYVLMTHETATVPVNALGTKFCDA <sup>S</sup> AHRTLIK <sup>S</sup> ALDFML <sup>L</sup> GI | 104 |
|             | .: : :.* : .:**...* :..* * :.. **.***:*. **                                         |     |

**Figure S4.** Multiple amino acid sequence alignment of CcdB proteins. CcdB proteins encoded by F plasmid (GenBank AAA96062), pSLP plasmid (WP\_001159863), UPEC CFT073 (WP\_001160966) and NRG857c (YP\_006118417) were alignment by CLUSTAL O(1.2.4). Identical amino acid residues are highlighted in black. Residue W99, reported to be crucial for CcdB toxicity in *E. coli*, along with its variation, are highlighted in yellow.
